# Supplementary material
Source: PubMed Central journal article supplement (PMC3274567)
Supplement: NIHMS328540-supplement-01.pdf [file NIHMS328540-supplement-01.pdf]

## Appendix

PECARN Steering Committee: P. Dayan, Chair; E. Alpern, K. Brown, D. Borgialli, J.

Chamberlain, L. Cimpello, E. Crain, J. M. Dean, M. Gorelick, D. Jaffe, N. Kuppermann, R.

Lichenstein, K. Lillis, P. Mahajan, D. Monroe, L. Nigrovic, E. Powell, A. Rogers, R. Ruddy, R.

Stanley, M. Tunik. MCHB/EMSC liaisons: D. Kavanaugh, H. Park

Central Data Management and Coordinating Center (CDMCC): M. Dean, R. Holubkov, A.

Donaldson, S. Zuspan, R. Enriquez

Feasibility and Budget Subcommittee (FABS): K. Brown, S. Goldfarb, Co-Chairs; E. Crain, E.

Kim, S. Krug, D. Monroe, D. Nelson, M. Berlyant, S. Zuspan

Grants and Publications Subcommittee (GAPS): M. Gorelick, Chair; L. Alpern, J. Anders, D.

Borgialli, L. Cimpello, A. Donaldson, G. Foltin, F. Moler, K. Shreve

Protocol Review and Development Subcommittee (PRADS): L. Nigrovic, Chair; J. Chamberlain,

P. Dayan, M. Dean, R. Holubkov, D. Jaffe, E. Powell, K. Shaw, R. Stanley, M. Tunik

Quality Assurance Subcommittee (QAS): K. Lillis, Chair; E. Alessandrini, S. Blumberg, R.

Enriquez, R. Lichenstein, P. Mahajan, R. McDuffie, R. Ruddy, B. Thomas, J. Wade

Safety and Regulatory Affairs Subcommittee (SRAS): W. Schalick, J. Hoyle, Co-Chairs; S.

Atabaki, K. Call, H. Hibler, M. Kwok, A. Rogers, D. Schnadower

Table 4, online. Data from adult studies.

| Reference        | Dose     | N  | CL<br>(mL/min/kg) | Vd (L/kg) | %<br>unbound | T1/2<br>(hrs) |
|------------------|----------|----|-------------------|-----------|--------------|---------------|
| Greenblatt 1977  | 5mg      | 4  | 0.75              | 0.84      |              | 13            |
| Kraus 1978       | 2mg      | 11 | 1.28              | 1.28      | 6.8%         | 22            |
| Greenblatt 1979  | 2-3mg    | 15 | 0.99              | 1.11      | 10.0%        | 14            |
| Patwardhan 1980  | 2mg      | 8  | 0.92              | 1.63      | 7.7%         | 21            |
| Wermeling 2001   | 2mg      | 11 | 1.02              | 1.32      |              | 16.6          |
| Crom 1991        | 0.3mg/kg | 10 | 1.02              | 0.78      | 8.4%         | 9             |
| Weighted Average |          | 59 | 1.03              | 1.20      |              | 16            |
| Package Insert   | 4mg      | -  | 1.1 ± 0.4         | 1.3       | 8.8%         | 14.5 ± 5      |
